# Supplementary material for: Phenome-wide association analysis of LDL-cholesterol lowering genetic variants in PCSK9
Source: BMC Cardiovasc Disord. 2019 Oct 29;19:240. doi: 10.1186/s12872-019-1187-z (PMC6820948; doi:10.1186/s12872-019-1187-z)
Supplement: Supplementary file 1 — Supplemental tables. (XLSX 62 kb) [file 12872_2019_1187_MOESM1_ESM.xlsx]

## Sheet: Appendix Table 1 SNP selection
SNP	MAF	LDL-C (mmol/L) mean difference	CAD odds ratio	CADD score#	Functionality
rs11583680	0.14	-0.05 (9*109)	0.98 (0.48)	8.94	Non-synonymous
rs11591147	0.01	-0.50 (8*10-145)	0.70 (4*10-4)**	11.5	Non-synonymous
rs2479409	0.33	0.06 (2*10-53)	1.04 (0.011)	4.94	Upstream
rs11206510	0.15	-0.08 (2*10-55)	0.92 (4*10-4)	NA	Intergenic
* all esimates are per minor allele, p-values are reported between brackets, the reported associations were extracted from the GLGC and CARDIoGRAMplusC4D consortia. ** based on Benn et.al., 2010 .
# see http://cadd.gs.washington.edu/ for an explanation on CADD scores

## Sheet: Appendix Table 2 Public data
Phenotype	Consortium abreviation	URL
Lipids	GLGC	http://csg.sph.umich.edu/abecasis/public/lipids2013/
Blood pressure	ICBP	https://www.ncbi.nlm.nih.gov/projects/gap/cgi-bin/study.cgi?study_id=phs000585.v1.p1
Cognition	SSGAC	http://www.thessgac.org/data
All-cause mortality	Benn 2010	https://www.ncbi.nlm.nih.gov/pubmed/20579540
Myocardial infarction	Benn 2010	https://www.ncbi.nlm.nih.gov/pubmed/20579540
Coronary artery disease	CardiogramplusC4D	http://www.cardiogramplusc4d.org/
Aggressive prostate cancer	Yeager 2007A	http://www.nature.com/ng/journal/v39/n5/abs/ng2022.html
Aggressive prostate cancer	Yeager 2007B	http://www.nature.com/ng/journal/v39/n5/abs/ng2022.html
Breast cancer	Hunter 2007	http://www.nature.com/ng/journal/v39/n7/abs/ng2075.html
Alzheimer	IGAP	http://web.pasteur-lille.fr/en/recherche/u744/igap/igap_download.php
Ischemic stroke	Matarin 2007	http://www.thelancet.com/journals/laneur/article/PIIS1474-4422(07)70081-9/abstract
COPD	UKBiLEVE	http://biobank.ctsu.ox.ac.uk/crystal/refer.cgi?id=2077
Thyroid cancer	Kohler 2013	http://press.endocrine.org/doi/10.1210/jc.2013-1941?url_ver=Z39.88-2003&rfr_id=ori%3Arid%3Acrossref.org&rfr_dat=cr_pub%3Dpubmed&
Melanoma	Amos 2011	http://hmg.oxfordjournals.org/content/20/24/5012.long
Lung cancers	Wang 2014	http://www.nature.com/ng/journal/v41/n9/full/ng.429.html
Pancreatic cancer	Amundadottir 2009	http://www.nature.com/ng/journal/v41/n9/full/ng.429.html
Glioma	Rajaraman 2012	http://link.springer.com/article/10.1007%2Fs00439-012-1212-0
Ischemic stroke	Metastroke	http://www.strokegenetics.org
Atrial fibrillation	AFGen Consortium	https://www.afgen.org
Meningioma	The Institute of Cancer Research	https://www.nature.com/articles/ng.879
Hodgkin lymphoma	The Institute of Cancer Research	https://www.ncbi.nlm.nih.gov/pubmed/24149102
Glioma	The Institute of Cancer Research	http://www.nature.com/articles/ncomms9559
Chronic lymphocytic leukaemia	The Institute of Cancer Research	https://www.nature.com/articles/ng.2843
Multiple myeloma risk	The Institute of Cancer Research	http://www.nature.com/articles/ncomms12050

## Sheet: Appendix Table 3 Genetics
Study	rs11206510 HWE p- value	rs11206510 HWE alpha	rs11206510 Common	rs11206510 Het	rs11206510 Rare	rs11206510 MAF	rs11591147 HWE p-value	rs11591147 HWE alpha	rs11591147 Common	rs11591147 Het	rs11591147 Rare	rs11591147 MAF	rs2479409 HWE p-value	rs2479409 HWE alpha	rs2479409 Common	rs2479409 Het	rs2479409 Rare	rs2479409 MAF	rs11583680 HWE p-value	rs11583680 HWE alpha	rs11583680 Common	rs11583680 Het	rs11583680 Rare	rs11583680 MAF	Genotyping call rate	Imputation Quality	Note: The Hardy-Weinberg goodness of fit tests are corrected for multiple testing using a bonferroni holm procedure to preserve a family-wise error rate (FEWER) of 0.05 or less; the corrected alpha's are presented in the "HWE alpha" columns.
1958BC	0.901546	0.00277778	3688	1679	189	0.185115	0.185472	0.000396825	5365	194	0	0.0174492	0.991724	0.0166667	2326	2540	693	0.353121	0.100229	0.00035461	4056	1305	125	0.141724	rs11583680, rs11591147, rs2479409, rs11206510: 0.9868705, 1, 1, 0.9994604
1982 Pelotas Birth Cohort	0.498187	0.000666667	1216	532	52	0.176667	0.746334	0.00125	1615	26	0	0.007922	0.385072	0.000510204	718	824	258	0.372222	0.355326	0.000490196	1321	330	16	0.108578	rs2479409 (Call rate=99.9%); rs11206510 (Call rate>99.9%)	rs11583680 (Imputed - INFO metric=0.97); rs11591147 (Imputed - INFO metric=0.843);
AMC-PAS	0.48527	0.000632911	440	175	21	0.170597	0.809137	0.00142857	617	12	0	0.00953895	0.264989	0.000442478	269	278	87	0.356467	0.974665	0.00833333	470	151	12	0.138231	call rate: rs11583680=0.9946, rs11591147=0.9878, rs2479409=0.9973 ,rs11206510=1.0000
ARIC	NA	NA	0	0	0	NA	0.750961	0.00131579	9281	304	3	0.016166	NA	NA	0	0	0	NA	0.0484163	0.000340136	6948	2200	205	0.139527	call rates > 0.99
BASE-II	0.514512	0.000714286	1178	551	71	0.1925	0.884903	0.00217391	1718	12	0	0.00346821	0.7165	0.00113636	776	817	207	0.341944	0.886647	0.00227273	1065	221	12	0.094376	call rates > 0.98
BiB	0.939968	0.00454545	2056	951	109	0.18758	NA	NA	0	0	0	NA	0.247123	0.000431034	1300	1401	413	0.357579	NA	NA	0	0	0	NA	call rates > 0.99
BRHS	0.874559	0.002	1754	544	41	0.133818	0.394434	0.000520833	2261	81	0	0.0172929	0.00174565	0.000316456	1053	983	305	0.340239	0.503884	0.000704225	1552	715	75	0.184671	call rates > 0.99
Bruneck	0.308682	0.00046729	515	255	39	0.20581	0.749287	0.00128205	793	18	0	0.0110974	0.4902	0.000641026	338	380	96	0.351351	0.988502	0.0125	619	179	13	0.126387	rs2479409 (0.99), rs11206510 (0.98), rs11583680 (0.99), rs11591147 (0.99)
BWHHS	0.413451	0.000531915	2234	1053	113	0.188088	0.751087	0.00135135	3314	98	1	0.0146499	0.472583	0.00060241	1485	1513	407	0.341703	0.542751	0.000735294	2465	825	75	0.144874	call rates > 0.99
CAPS	0.904805	0.00294118	822	226	15	0.120414	0.574764	0.000793651	1029	36	0	0.0169014	0.0104048	0.000322581	488	438	139	0.33615	0.982341	0.01	732	302	31	0.170892	call rates > 0.99
Cardia	NA	NA	0	0	0	NA	0.520559	0.000724638	1395	48	0	0.016632	NA	NA	0	0	0	NA	0.606475	0.000862069	1045	368	29	0.147712	call rates > 0.99
CHS	NA	NA	0	0	0	NA	0.246594	0.00042735	3834	116	2	0.0151822	NA	NA	0	0	0	NA	0.104415	0.000357143	2951	914	87	0.137652	call rates > 0.99
CoLaus	0.258397	0.000438596	2648	1404	206	0.213246	NA	NA	0	0	0	NA	0.286714	0.000458716	1847	1949	478	0.339846	0.00169151	0.000314465	2264	354	2	0.0683206	call rates > 0.99	rs11583680 r-squared: 0.4
Cyprus	NA	NA	NA	NA	NA	NA	NA	NA	NA	NA	NA	NA	NA	NA	NA	NA	NA	NA	NA	NA	NA	NA	NA	NA	call rate 99%
DESIR	0.213004	0.000406504	3033	1573	182	0.202277	0.548732	0.000746269	4607	183	1	0.019307	0.630216	0.000925926	1981	2185	621	0.357949	0.274878	0.00045045	3519	1151	82	0.138363	call rates ≥95%
EAS	0.0052232	0.000318471	525	224	9	0.159631	0.645691	0.000980392	739	25	0	0.0163613	0.377642	0.000505051	350	342	72	0.318063	0.582531	0.000833333	500	239	25	0.189136	call rates > 0.99
ELSA	0.631356	0.000943396	1362	482	39	0.148699	0.453143	0.000581395	1819	64	0	0.0169942	0.0179783	0.000328947	828	806	249	0.346256	0.876539	0.00208333	1224	587	72	0.194105	call rates > 0.99
eMERGE	NA	NA	0	0	0	NA	0.45277	0.000574713	8942	142	0	0.00781594	NA	NA	0	0	0	NA	0.443739	0.000561798	6847	2187	163	0.136621
EPIC NL	0.856267	0.00172414	3805	1275	109	0.143862	0.924471	0.00357143	5042	149	1	0.0145416	0.657832	0.001	2308	2298	588	0.334424	0.358316	0.0005	3375	1610	208	0.19507	call rates 0.999615
EPICOR	0.753926	0.00138889	358	185	22	0.202655	0.733039	0.00121951	550	16	0	0.0141343	0.936092	0.00416667	241	256	69	0.348057	0.836743	0.00151515	428	126	10	0.129433	call rate: rs11583680=0.9964, rs11591147=1, rs2479409=1 ,rs11206510=0.9982
ET2DS	0.81469	0.00147059	748	233	17	0.133768	0.574644	0.00078125	972	35	0	0.0173784	0.870134	0.00192308	454	446	107	0.327706	0.339535	0.00047619	663	313	30	0.185388	call rates > 0.99
Fenland	0.193619	0.0004	6322	3000	326	0.189262	0.1306	0.000362319	9325	292	0	0.0151814	0.138587	0.00037594	4148	4302	1192	0.346712	0.967908	0.00714286	7073	2197	170	0.134375	rs11206510 99.96%; rs2479409 99.88%; rs11591147 99.96%; rs11583680 99.87%	all genotyped
FHS offspring	NA	NA	0	0	0	NA	0.355129	0.000485437	2923	100	0	0.0165399	NA	NA	0	0	0	NA	0.13816	0.000373134	2246	708	69	0.139927	call rates > 0.99
Framingham Heart Study	NA	NA	0	0	0	NA	0.0350282	0.00033557	3743	116	3	0.0157949	NA	NA	0	0	0	NA	0.921477	0.003125	2891	900	71	0.134904	call rates > 0.99
Generation Scotland	0.424669	0.000537634	4717	2017	230	0.177843	0.0174551	0.000326797	6743	216	5	0.0162263	0.924039	0.00333333	851	3172	2941	0.650057	0.174429	0.000384615	5162	1683	119	0.137924	call rate > 98%
HAPIEE	0.839359	0.0016129	20398	7450	674	0.154232	NA	NA	0	0	0	NA	NA	NA	0	0	0	NA	4.78716e-10	0.000310559	22450	5531	475	0.113878
Health 2006	0.625617	0.000909091	1909	882	108	0.189376	0.457183	0.000588235	2822	79	0	0.013616	0.959334	0.00555556	1238	1310	348	0.34634	0.104505	0.000359712	2122	722	47	0.141128	call rate: rs11583680=0.9949, rs11591147=1.0000, rs2479409=0.9998 ,rs11206510=0.9999
HIFMECH	0.438264	0.000549451	692	304	39	0.184541	0.709433	0.00106383	1037	24	0	0.0113101	NA	NA	0	0	0	NA	NA	NA	0	0	0	NA	call rate rs11583680: 96%, rs11206510: 94%
Hunter Community Study	0.0829046	0.00034965	1290	540	73	0.180242	NA	NA	0	0	0	NA	NA	NA	0	0	0	NA	NA	NA	0	0	0	NA		r-squared = 0.89.
Inter 99	0.991899	0.025	3979	1829	210	0.186856	0.330939	0.000471698	5871	149	0	0.0123754	0.0319197	0.000333333	2629	2624	740	0.342399	0.718916	0.00116279	4421	1423	119	0.139276	call rate: rs11583680=0.9949, rs11591147=1.0000, rs2479409=0.9998 ,rs11206510=0.9999
INTERHEART	0.494561	0.000649351	1276	555	54	0.175862	NA	NA	0	0	0	NA	0.425839	0.000543478	800	866	216	0.344846	NA	NA	0	0	0	NA	rs11583680, rs11591147, rs2479409, rs11206510: NA,NA,0.9995,0.9979
INTERSTROKE	0.0797302	0.000347222	1174	525	43	0.175373	NA	NA	0	0	0	NA	0.353783	0.000480769	747	774	221	0.349024	0.251884	0.000434783	1323	384	35	0.13031	rs2479409 (genotyped;r2=1;callrate=1),rs11206510 (genotyped;r2=1;callrate=1)	rs11583680 (imputed; r2=0.996; callrate=1)
JUPITER	0.715272	0.00111111	5604	2803	342	0.19928	0.901453	0.00263158	8239	502	8	0.0296034	0.732322	0.00119048	3894	3875	980	0.333467	0.409621	0.000526316	6414	2143	192	0.144417
Lifelines	0.012972	0.000324675	10387	2851	157	0.118141	0.608628	0.000877193	13277	118	0	0.00440463	0.137944	0.00037037	6209	5876	1310	0.317133	0.891096	0.00238095	8350	4455	590	0.21034	call rates > 0.99
NEO	0.483448	0.000625	3677	1844	218	0.198641	0.994522	0.05	5589	149	1	0.0131556	0.943049	0.005	2503	2576	660	0.339432	0.153449	0.000381679	1934	289	16	0.0716838	call rates > 0.99	rs11583680 imputed, R2=0.866
NPHS-II	NA	NA	0	0	0	NA	0.06899	0.000344828	2401	42	1	0.00900164	0.282432	0.000454545	1044	1050	291	0.342138	0.560022	0.000769231	1740	562	50	0.140731	call rate rs11583680: 98%, rs2479409: 99% rs11591147: 96%
PIVUS	0.184631	0.000393701	650	262	35	0.17529	0.680612	0.00102041	922	25	0	0.0131996	0.4828	0.000617284	419	429	99	0.331045	0.503222	0.000675676	715	213	19	0.132524	call rates 1,00
PREVEND	0.236876	0.000423729	1046	139	2	0.0602359	0.926568	0.00384615	2384	9	0	0.00188048	0.000833809	0.0003125	134	198	33	0.361644	0.131809	0.000364964	507	68	0	0.0591304	call rates 1,00	rs11206510 (Imputed INFO=0.822) rs2479409 (Imputed INFO=0.784) rs11591147 (Imputed INFO=0.571) rs11583680 (Imputed INFO=0.668)
Rotterdam study	0.194015	0.000403226	2358	1048	134	0.185876	0.575575	0.000806452	3474	66	0	0.00932203	0.689834	0.00104167	1605	1565	370	0.325565	0.023236	0.000331126	2627	826	87	0.141243	call rates > 0.99, expect rs2479409 = 0.95.
SHIP	0.497549	0.000657895	2678	1255	137	0.187838	0.38656	0.000515464	3961	109	0	0.0133907	0.576272	0.000819672	1757	1822	491	0.344472	0.863108	0.00185185	3017	975	77	0.138732	rs11206510 (1.00), rs2479409 (1.00)	r2 = 1.00 for rs11591147 and rs2479409, r2=0.67 for rs11591147, r2=0.78 for rs11583680
SHIP-TREND	0.356546	0.00049505	667	293	26	0.174949	0.183976	0.000390625	953	32	1	0.0172414	0.03666	0.000337838	431	419	136	0.350406	0.224645	0.000416667	761	215	10	0.119168	rs11206510 (1.00), rs2479409 (1.00), rs11591147 (1.00), rs11583680 (1.00)	r2 = 1.00 for rs11591147, rs2479409, rs11206510 and rs11583680
TPT	0.503794	0.000694444	2495	1081	126	0.180038	0.442389	0.000555556	3743	94	0	0.0122492	NA	NA	0	0	0	NA	NA	NA	0	0	0	NA	call rate rs11583680: 96%, rs11206510: 90%
UCP	0.896974	0.0025	2096	972	111	0.187795	0.644774	0.000961538	3089	88	1	0.0141598	0.21851	0.000413223	1352	1418	409	0.351683	NA	NA	0	0	0	NA	call rate: rs11206510 = 0.9997; rs11591147 = 0.9991; rs2479409 = 0.9997	`
UDACS	0.503689	0.000684932	485	225	22	0.183743	0.713005	0.00108696	739	20	0	0.0131752	NA	NA	0	0	0	NA	NA	NA	0	0	0	NA	call rate: rs11591147=0.98 ,rs11206510=0.95
UHP	NA	NA	0	0	0	NA	NA	NA	0	0	0	NA	0.962765	0.00625	831	884	234	0.346845	0.098249	0.000352113	1250	636	63	0.195485	call rates > 99%
UKHLS	0.143347	0.000378788	6364	2822	345	0.184241	0.459357	0.000595238	9253	277	1	0.0146364	0.602223	0.000847458	4017	4357	1154	0.349759	0.620421	0.000892857	7060	2246	171	0.136541	call rates ≥ 99%
WGHS	0.137874	0.000367647	15013	6787	818	0.186201	0.177744	0.000387597	22520	764	10	0.0168284	0.447297	0.000568182	9646	10209	2762	0.347814	0.837681	0.0015625	17466	5405	423	0.134176
WHII	0.305353	0.000462963	3771	1193	83	0.134634	0.482084	0.000609756	4910	154	2	0.0155942	0.00810281	0.000320513	2282	2157	602	0.333366	0.216436	0.000409836	3357	1502	188	0.186051	call rates > 0.99
Women's Health Initiative (WHI)	NA	NA	0	0	0	NA	0.231301	0.000420168	7620	209	0	0.0133478	0.268579	0.000446429	3283	3619	944	0.350943	0.856626	0.00178571	5847	1806	137	0.133504
WOSCOPS	0.0531601	0.000342466	3504	1293	95	0.151574	0.554422	0.000757576	4810	82	0	0.00838103	0.853445	0.00166667	1963	2267	662	0.367028	NA	NA	0	0	0	NA	call rates 100%

## Sheet: Appendix Table 4 Baseline data
Study	Number of subjects	Mean Age	SD Age	Number of subjects with an observed age	Proportion Male	Number of subjects with gender observed	Mean LDL-C	SD LDL-C	Number of subjects with an observed LDL-C	Mean HDL-C	SD HDL-C	Number of subjects with an observed HDL-C	Mean SBP	SD SBP	Number of subjects with an observed SBP	Mean DBP	SD DBP	Number of subjects with an observed DBP	Proportion history of CVD	Number of subjects with an observed history of CVD
1958BC	5559	45	NA	5559	0.454938	5559	3.4333	0.903555	5559	1.54816	0.3919	5559	127.228	16.561	5559	79.1339	10.9032	5559	0.154346	5384
1982 Pelotas Birth Cohort	1859	30.2	0.35	1859	0.474449	1859	2.83458	0.72989	1859	1.51909	0.361518	1859	120.812	13.5859	1859	75.368	9.28496	1859	NA	0
AMC-PAS	636	43.1682	5.21732	636	0.762579	636	3.84	1.22	636	1.13495	0.368253	636	128.786	17.5773	636	79.8994	10.5324	636	0	636
ARIC	9588	54.2769	5.68872	9588	0.464748	9588	3.55747	0.976505	9588	1.3106	0.435393	9588	118.337	16.9955	9588	71.5237	10.0032	9588	0.0662286	9588
BASE-II	2170	59.0963	17.1522	2170	0.481106	2170	3.17908	0.949649	2170	1.60435	0.436031	2170	139.92	20.2525	2170	82.0675	11.1026	2170	0.191329	2122
BiB	3117	26.7222	6.06245	3117	0	3117	3.53969	1.00163	3117	1.99355	0.418271	3117	112.66	11.2365	3117	66.3181	8.37076	3117	NA	NA
BRHS	2342	68.9061	5.61514	2342	1	2342	3.89235	0.996399	2342	1.14579	0.245518	2342	144.165	19.9505	2342	81.8817	12.8602	2342	0.0674637	2342
Bruneck	816	62.6458	11.1078	816	0.488971	816	3.76241	0.992213	816	1.51982	0.415599	816	148.295	20.7787	816	87.1413	9.23633	816	0.127451	816
BWHHS	3413	68.8588	5.51376	3413	0	3413	4.14859	1.08737	3413	1.65653	0.453222	3413	147.033	25.1164	3413	79.4509	11.8565	3413	0.131263	3413
CAPS	1065	56.7746	4.4557	1065	1	1065	3.74648	0.896332	1065	1.02587	0.250619	1065	145.784	22.3954	1065	84.6425	11.7272	1065	0.0300469	1065
Cardia	1443	25.5842	3.37204	1443	0.465696	1443	2.81902	0.759568	1443	1.34646	0.325367	1443	109.282	10.8072	1443	68.5062	9.05722	1443	NA	NA
CHS	3952	72.774	5.5971	3952	0.438259	3952	3.3695	0.918541	3952	1.38738	0.405469	3952	135.472	21.4384	3952	69.9826	11.2467	3952	0.148279	3952
CoLaus	4274	53.3966	10.7008	4274	0.468882	4274	3.33366	0.909926	4274	1.64718	0.439971	4274	128.103	17.7296	4274	79.0974	10.7233	4274	0.0638746	4274
Cyprus	1102	59.2768	10.8	1102	0.483666	1102	3.58684	0.848595	1102	1.30717	0.337937	1102	138.022	17.4776	1102	83.5627	10.4672	1102	0.114859	1097
DESIR	4791	46.6385	10.0662	4791	0.494886	4791	3.37431	0.908762	4791	1.62862	0.424131	4791	131.28	15.7209	4791	79.9952	9.67923	4791	0.0173932	4657
EAS	764	64.5065	5.64421	764	0.484293	764	5.35466	1.23936	764	1.45271	0.372409	764	143.418	23.7575	764	77.456	12.203	764	0.106021	764
ELSA	1883	73.6893	9.44494	1883	0.52735	1883	3.42578	1.05746	1883	1.48948	0.385758	1883	139.008	19.6608	1883	72.9669	11.4259	1883	0.242698	1883
eMERGE	9266	37.9	14.4	9266	0.493633	9266	2.76625	0.76553	9266	1.28255	0.366748	9266	NA	NA	9266	NA	NA	9266	NA	NA
EPIC NL	5194	54.0585	10.1145	5194	0.218906	5194	3.25179	0.897811	5194	1.39741	0.414485	5194	133.074	21.1651	5194	80.4263	10.8889	5194	0	5194
EPICOR	566	52.9255	7.38469	566	0.64311	566	3.8754	1.04759	566	1.48269	0.392907	566	137.932	19.2111	566	85.3773	10.0052	566	0	566
ET2DS	1007	67.8928	4.22955	1007	0.51142	1007	NA	NA	NA	1.29742	0.363198	1007	133.437	16.5265	1007	69.2149	9.00595	1007	0.33565	1007
Fenland	9653	48.6697	7.36302	9653	0.532477	9653	3.41314	0.907205	9653	1.52976	0.413544	9653	123.104	15.5192	9653	74.5781	10.1964	9653	NA	NA
FHS offspring	3283	34.8276	9.73166	3283	0.459336	3283	2.33575	0.827363	3283	1.33018	0.38038	3283	120.046	14.7435	3283	77.6613	10.1588	3283	0.0018276	3283
Framingham Heart Study	3862	40.1378	8.80843	3862	0.532367	3862	2.89875	0.818705	3862	1.40904	0.41644	3862	116.789	14.0943	3862	75.3351	9.67505	3862	0.007768	3862
Generation Scotland	6964	57.1196	10.6916	6964	0.420735	6964	NA	NA	NA	1.49348	0.430074	6964	136.374	18.5791	6964	81.4532	10.1977	6964	0.0491097	6964
HAPIEE	34876	58.6083	7.27589	34876	0.466166	34876	3.76377	1.03735	34876	1.4693	0.419138	34876	140.097	22.1341	34876	88.5971	12.2742	34876	0.190389	34876
Health 2006	2901	49.5712	12.8874	2901	0.453981	2901	3.23079	0.920665	2901	1.53845	0.431111	2901	130.677	17.8689	2901	81.9052	10.6356	2901	NA	NA
HIFMECH	1106	51.6718	5.44473	1106	1	1106	NA	NA	NA	NA	NA	1106	128.843	16.0323	1106	83.0064	9.49499	1106	0.481013	1106
Hunter Community Study	3017	66.2599	7.80495	3017	0.472986	3017	3.08824	0.902466	3017	1.3527	0.36846	3017	135.672	18.8226	3017	78.6125	9.98981	3017	0.0311568	3017
Inter 99	6022	46.2332	7.91012	6022	0.487878	6022	3.51054	0.959609	6022	1.43507	0.40217	6022	130.635	17.6001	6022	82.5719	11.4199	6022	0.0184324	6022
INTERHEART	1886	60.4486	11.9049	1886	0.706257	1886	3.58633	1.06772	1886	1.17891	0.368289	1886	130.857	20.0049	1886	79.7163	11.753	1886	0.519088	1886
INTERSTROKE	1742	66.8685	12.5219	1742	0.549943	1742	2.9638	0.995101	1742	1.23909	0.388744	1742	136.933	19.3722	1742	78.8729	11.566	1742	0.547072	1742
JUPITER	8749	66.0975	7.76692	8749	0.678249	8749	2.75354	0.448614	8749	NA	NA	8749	135.577	16.4353	8749	79.7566	8.7911	8749	NA	NA
Lifelines	13395	48.1324	11.4445	13395	0.417917	13395	3.28701	0.897886	13395	1.44686	0.386291	13395	128.488	15.8329	13395	75.3472	9.07013	13395	NA	0
NEO	5739	55.9749	5.94632	5739	0.4797	5739	3.53591	0.982234	5739	1.43107	0.412774	5739	132.811	17.1602	5739	85.0755	10.3133	5739	0.0731835	5739
NPHS-II	3012	56.0714	3.48578	3012	1	3012	3.08998	1.00542	3012	1.70965	0.584233	3012	138.11	19.1555	3012	84.4535	11.2928	3012	0	3012
PIVUS	1014	70.1507	0.154643	1014	0.499014	1014	3.3783	0.875637	1014	1.51177	0.42709	1014	149.65	22.6713	1014	78.6891	10.1812	1014	0.129191	1014
PREVEND	3649	49.624	12.4876	3649	0.51521	3649	NA	NA	NA	1.31098	0.398025	3649	129.053	19.9436	3649	74.1404	9.93243	3649	0.0353522	3649
Rotterdam study	3540	66.0896	7.23314	3540	0.585311	3540	NA	NA	NA	1.35744	0.37402	3540	135.999	20.5476	3540	73.5184	10.7787	3540	0.108757	3540
SHIP	4070	49.7592	16.2685	4070	0.492629	4070	3.57093	1.15619	4070	1.44928	0.440181	4070	136.168	21.3079	4070	83.4627	11.334	4070	0.0794751	4039
SHIP-TREND	986	50.1308	13.6939	986	0.438134	986	3.41992	0.914911	986	1.48051	0.368798	986	124.452	17.0001	986	76.6665	9.88355	986	0.0142132	985
TPT	5085	57.5092	6.76632	5085	1	5085	NA	NA	NA	NA	NA	5085	138.981	18.1985	5085	82.5806	10.4418	5085	0	5085
UCP	3179	63.268	10.0091	3179	0.717207	3179	3.28553	1.14095	3179	1.245	0.306962	3179	150	25.4709	3179	87.5385	12.2448	3179	NA	NA
UDACS	790	62.4557	13.7313	790	0.605063	790	2.79921	0.934024	790	1.41926	0.479866	790	140.032	20.4441	790	79.8962	11.1926	790	0.241997	781
UHP	1949	40.2584	13.4668	1949	0.466393	1949	3.38213	0.983195	1949	1.47926	0.395092	1949	138.584	21.5903	1949	84.7296	13.2309	1949	0.0030785	1949
UKHLS	9531	52.8674	16.8053	9531	0.437205	9531	NA	NA	NA	1.55018	0.467074	9944	126.842	16.5232	9944	73.2931	10.7191	9944	NA	NA
WGHS	23294	54.6985	7.11505	23294	0	23294	3.21504	0.883175	23294	NA	NA	23294	123.639	13.6725	23294	76.7135	9.00772	23294	NA	NA
WHII	5067	44.3767	5.9362	5067	0.735938	5067	4.36552	1.01218	5067	1.42349	0.397634	7882	132.96	18.6862	7882	74.9568	9.68018	7882	NA	NA
Women's Health Initiative (WHI)	7882	67.9806	6.58167	7882	0	7882	3.57406	0.929436	7882	1.43194	0.406938	5067	120.232	13.2003	5067	79.5111	9.25062	5067	NA	NA
WOSCOPS	4892	55.1172	5.51574	4892	1	4892	4.96838	0.449313	4892	1.13721	0.2432	4892	135.541	17.2553	4892	83.9933	10.4102	4892	NA	NA

## Sheet: Appendix Table 5 Cognition
Study	Cognition measurement instrument
1982 Pelotas Birth Cohort	Wechsler Adult Intelligence Scale, subtests: arithmetic; digit symbol, similarities; and picture completion
BASE-II	Mini Mental State Examination
CAPS	Word recall test
ELSA	Word recall test
Hunter Community Study	Audio Recorded Cognitive Screen
Lifelines	Mini Mental State Examination
UKHLS	Average standardized sum score of an imidiate recal test, delayed recal test, animal naming and the subtract 7 test
WHII	Mini Mental State Examination
SSGAC	Cognitive performance (results from a principle components analysis on a "battery" of cognition tests), see Rietveld 2015 for details

## Sheet: Appendix Table 6 GENvsRCT GE
Genetic biomarker data scaled to 1 mmol/L lower LDL-C
	MeanDifference	95%CI_LB	95%CI_UB
LDL-C	-1	-1.06665	-0.933353
HDL-C	0.0472539	0.0180204	0.0764875
Triglycerides	-0.0682725	-0.123962	-0.0125825
Total Cholesterol	-1.01079	-1.06695	-0.954623
Apolipoprotein A 1	0.0278302	-0.00672265	0.062383
Apolipoprotein B	-0.215139	-0.247413	-0.182864
non-HDL-C	-0.882672	-0.992134	-0.77321
RCT biomarker data
	MeanDifference	95%CI_LB	95%CI_UB
LDL-C	-31.5593	-32.5195	-30.5992
HDL-C	3.00255	2.39378	3.61133
Triglycerides	-8.00777	-9.17083	-6.84471
Total Cholesterol	-19.6056	-20.4646	-18.7467
Apolipoprotein A 1	1.91012	1.30292	2.51731
Apolipoprotein B	-26.1785	-27.1199	-25.2371
non-HDL-C	-27.403	-28.3332	-26.4729
Genetic clinical endpoint data scaled to 1 mmol/L lower LDL-C
	OR	95%CI_LB	95%CI_UB
any MI	0.5318	0.418438	0.675872
CABG/PCI	0.748034	0.439152	1.27417
Ischemic stroke	0.835196	0.57065	1.22238
Hemorrhagic stroke	1.28711	0.757643	2.1866
T2DM	1.293	1.504	1.111
any cancer	0.970122	0.805934	1.16776
RCT clinical endpoint data scaled to 1 mmol/L lower LDL-C
	OR	95%CI_LB	95%CI_UB
Any myocardial infarction	0.895118	0.861385	0.930171
Revascularization	0.89651	0.862159	0.93223
Ischemic stroke	0.849711	0.780416	0.925159
Hemorrhagic stroke	0.962802	0.753363	1.23047
Type 2 diabetes	0.999291	0.960409	1.03975
Cancer	0.949653	0.777159	1.16043
